# Supplementary material for: Phosphorylation switches Bax from promoting to inhibiting apoptosis thereby increasing drug resistance
Source: PubMed Central journal article supplement — EMBO Rep. 2018 Jul 10;19(9):e45235. doi: 10.15252/embr.201745235 (PMC6123645; doi:10.15252/embr.201745235), 2018-07-10
Supplement: EMBR-19-e45235-s001.pdf [file EMBR-19-e45235-s001.pdf]

## **Appendix**

### **Table of Contents**

|                                 |          |
|---------------------------------|----------|
| <b>Appendix Figure S1 .....</b> | <b>2</b> |
| <b>Appendix Table S1 .....</b>  | <b>3</b> |
| <b>Appendix Table S2 .....</b>  | <b>4</b> |
| <b>Appendix Table S3 .....</b>  | <b>5</b> |

|               | Image                                                                             | Scattergram                                                                       | Pearson's Coefficient (Rr) |
|---------------|-----------------------------------------------------------------------------------|-----------------------------------------------------------------------------------|----------------------------|
| GFP-Bax       | 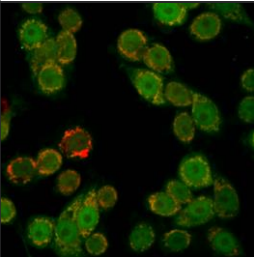 |  | 0.644                      |
| GFP-Bax S184A |  |  | 0.607                      |
| GFP-Bax S184E |  |  | 0.206                      |

**Appendix Figure S1.** Colocalization analysis of images from Figure 2C. MDA-MB-468 cells were transfected with plasmids encoding GFP-Bax, GFP-Bax S184A or GFP-Bax S184E. Cells were co-stained with MitoTracker Red CMXRos (mitochondria) and DAPI (nucleus). Whole image Pearson's correlation coefficients between MitoTracker and GFP for the single image shown above were calculated using CoLocalizer Pro software for Mac.

## Appendix Table S1

|      | MBA-MB-468 |          |         |          | MBA-MB-435 |          |         |          | ZR-75-1  |          |         |          | MCF-7    |          |         |          |
|------|------------|----------|---------|----------|------------|----------|---------|----------|----------|----------|---------|----------|----------|----------|---------|----------|
|      | LY294002   | Deguelin | MK-2206 | A-443654 | LY294002   | Deguelin | MK-2206 | A-443654 | LY294002 | Deguelin | MK-2206 | A-443654 | LY294002 | Deguelin | MK-2206 | A-443654 |
| Bid  | 0.0333     | 0.0016   | <0.0001 | <0.0001  | ns         | ns       | ns      | ns       | 0.0004   | 0.0024   | <0.0001 | <0.0001  | ns       | ns       | ns      | ns       |
| Bim  | ns         | 0.0183   | 0.0008  | 0.0002   | ns         | ns       | ns      | ns       | <0.0001  | 0.0003   | <0.0001 | <0.0001  | ns       | ns       | ns      | ns       |
| Bad  | ns         | ns       | 0.0031  | 0.0203   | ns         | ns       | ns      | ns       | ns       | <0.0001  | <0.0001 | <0.0001  | ns       | ns       | ns      | ns       |
| Puma | ns         | ns       | 0.0002  | 0.0017   | ns         | ns       | ns      | ns       | 0.0145   | 0.0422   | <0.0001 | <0.0001  | ns       | ns       | ns      | ns       |
| Bmf  | ns         | ns       | 0.0064  | 0.0432   | ns         | ns       | ns      | ns       | <0.0001  | 0.0128   | <0.0001 | 0.0003   | ns       | ns       | ns      | ns       |

**Related to Figure 4A.** Two-way ANOVA was conducted on the influence of two independent variables (BH3 peptide, drug) on cytochrome c release of isolated mitochondria for each cell-line. BH3 peptide included Bid, Bim, Bad, Puma and BMF. Drug included LY294003, Deguelin, MK-2206 and A-443654. Each drug treatment was statistically compared to DMSO control within each peptide group using t-tests with Bonferroni correction for multiple comparisons. Table indicates p-values for each comparison (ns=not significant). Data are located in Figure 4A.

## Appendix Table S2

|      | MDA-MB 468 S100 |                          |                          |                         |                          |                   |                     | ZR-75-1 S100 |                          |                          |                         |                          |                   |                     |
|------|-----------------|--------------------------|--------------------------|-------------------------|--------------------------|-------------------|---------------------|--------------|--------------------------|--------------------------|-------------------------|--------------------------|-------------------|---------------------|
|      | MDA-MB 468 S100 | LY294002 pretreated S100 | Deguelin pretreated S100 | MK-2206 pretreated S100 | A-443654 pretreated S100 | Akt depleted S100 | IgG pretreated S100 | ZR-75-1 S100 | LY294002 pretreated S100 | Deguelin pretreated S100 | MK-2206 pretreated S100 | A-443654 pretreated S100 | Akt depleted S100 | IgG pretreated S100 |
| Bid  | 0.0031          | ns                       | ns                       | ns                      | 0.0324                   | ns                | 0.0432              | 0.0004       | ns                       | ns                       | ns                      | ns                       | ns                | 0.003               |
| Bim  | 0.0003          | ns                       | ns                       | ns                      | ns                       | ns                | 0.0027              | <0.0001      | ns                       | ns                       | ns                      | ns                       | ns                | 0.0003              |
| Bad  | 0.0013          | ns                       | ns                       | ns                      | ns                       | ns                | 0.0002              | 0.0316       | ns                       | ns                       | ns                      | ns                       | ns                | 0.0026              |
| Puma | <0.0001         | ns                       | ns                       | ns                      | ns                       | ns                | 0.001               | 0.0014       | ns                       | ns                       | ns                      | ns                       | ns                | 0.0001              |
| Bmf  | ns              | ns                       | ns                       | ns                      | 0.0044                   | ns                | ns                  | 0.0053       | ns                       | ns                       | ns                      | ns                       | ns                | 0.0013              |

**Related to Figure 4C and EV2B.** Two-way ANOVA was conducted on the influence of two independent variables (BH3 peptide, treatment) on cytochrome *c* release of isolated mitochondria from ABT-737 sensitive MDA-MB-435 cells that were treated with the S100 fraction isolated from ABT-737 resistant MDA-MB-468 or ZR-75-1 cells. BH3 peptide included Bid, Bim, Bad, Puma and BMF. Treatment included S100, LY294003 pretreated S100, Deguelin pretreated S100, MK-2206 pretreated S100, A-443654 pretreated S100, Akt depleted S100 and IgG pretreated S100. Each treatment was statistically compared to control within each peptide group using t-tests with Bonferroni correction for multiple comparisons. Table indicates p-values for each comparison (ns=not significant). Data for Bid MDA-MB-468 S100 treatments are in Figure 4C and the rest of the data are located in Figure EV2B.

**Appendix Table S3**

|                           |                                  | AKT1     |          | AKT2     |          | PIK3CA   |          | PIK3R1   |          | PTEN     |          |
|---------------------------|----------------------------------|----------|----------|----------|----------|----------|----------|----------|----------|----------|----------|
|                           |                                  | CNA      | mRNA     |
| Pan Cancer                | <i>BAX</i> gain                  | 1.00E-05 | 1.00E-02 | 1.00E-53 | 1.00E-37 | NS       | 1.00E-06 | 1.00E-06 | 1.00E-13 | NS       | NS       |
|                           | High <i>BAX</i> mRNA expression  | NS       | 1.00E-08 | NS       | 1.00E-04 | NS       | 1.00E-95 | NS       | 1.00E-80 | NS       | 1.00E-30 |
| Breast Invasive Carcinoma | <i>BAX</i> gain                  | 2.00E-68 | NS       | 4.00E-13 | 8.00E-14 | NS       | NS       | 2.00E-08 | 1.00E-03 | NS       | NS       |
|                           | High <i>BAX</i> mRNA expression  | NS       | 8.00E-22 | 7.00E-03 | 1.00E-09 | 9.00E-03 | 4.00E-54 | NS       | 4.00E-36 | NS       | 3.00E-44 |
| Pan Cancer                | <i>BAK1</i> gain                 | NS       | NS       | 4.00E-05 | NS       | NS       | NS       | NS       | NS       | 1.00E-10 | NS       |
|                           | High <i>BAK1</i> mRNA expression | NS       | 2.00E-03 | NS       | NS       | NS       | NS       | NS       | 1.00E-58 | NS       | 5.00E-06 |
| Breast Invasive Carcinoma | <i>BAK1</i> gain                 | NS       | NS       | 4.00E-04 | NS       | 8.00E-06 | NS       | 1.00E-16 | 4.00E-04 | NS       | 2.00E-03 |
|                           | High <i>BAK1</i> mRNA expression | NS       | NS       | NS       | 4.00E-06 | NS       | NS       | 2.00E-16 | 1.00E-08 | 2.00E-04 | 1.00E-18 |

**Related to Figure 6C and EV5B.** TCGA database was probed for significant associations between the row heading (e.g. *BAX* gain) and copy number (CNA) gain/loss (red/blue) or mRNA up/downregulation (red/blue) of the indicated genes (AKT1, AKT2, PIK3CA, PIK3R1, PTEN). The p-values are indicated for each analysis. This data was used to generate Figure 6C and EV5B. NS = non-significant p-value for positive/negative associations.
